# Supplementary material
Source: PubMed Central journal article supplement (PMC3616541)
Supplement: mt2012230x1.pdf [file mt2012230x1.pdf]

**Table S1. Analysis of the effects of varying clinical scenarios for GEE models fitted individually for each of the type of preclinical evidence<sup>a</sup>**

| Preclinical evidence                                                                | Scenario 7               |              | Scenario 6               |              | Scenario 5               |              | Scenario 4               |              | Scenario 3               |              | Scenario 2               |              |
|-------------------------------------------------------------------------------------|--------------------------|--------------|--------------------------|--------------|--------------------------|--------------|--------------------------|--------------|--------------------------|--------------|--------------------------|--------------|
|                                                                                     | Odds ratio (95% Wald CI) | Wald p-value | Odds ratio (95% Wald CI) | Wald p-value | Odds ratio (95% Wald CI) | Wald p-value | Odds ratio (95% Wald CI) | Wald p-value | Odds ratio (95% Wald CI) | Wald p-value | Odds ratio (95% Wald CI) | Wald p-value |
| Primary human cells                                                                 | 13.08                    | <0.001       | 6.45                     | <0.001       | 4.35                     | <0.001       | 3.20                     | <0.001       | 1.87                     | <0.001       | 1.20                     | 0.050        |
| Primary human cells, mouse model in 2 years                                         | 13.13                    | <0.001       | 6.78                     | <0.001       | 5.22                     | <0.001       | 3.19                     | <0.001       | 1.72                     | <0.001       | 1.14                     | 0.129        |
| Good mouse model                                                                    | 14.64                    | <0.001       | 7.85                     | <0.001       | 5.12                     | <0.001       | 3.35                     | <0.001       | 1.23                     | 0.365        | 1.00                     | 1.000        |
| Poor mouse model                                                                    | 14.08                    | <0.001       | 8.76                     | <0.001       | 5.52                     | <0.001       | 3.38                     | <0.001       | 1.78                     | <0.001       | 1.00                     | 1.000        |
| Good mouse model, large animal study would delay trial by 3 years                   | 14.91                    | <0.001       | 10.57                    | <0.001       | 6.43                     | <0.001       | 4.35                     | <0.001       | 1.93                     | <0.001       | 0.95                     | 0.655        |
| Large animal model                                                                  | 14.45                    | <0.001       | 7.60                     | <0.001       | 4.08                     | <0.001       | 2.60                     | 0.004        | 0.49                     | 0.092        | 0.25                     | 0.326        |
| Good mouse model, data from related phase I trial without adverse events            | 13.61                    | <0.001       | 7.50                     | <0.001       | 5.47                     | <0.001       | 1.71                     | 0.160        | 0.83                     | 0.564        | 0.83                     | 0.316        |
| Good mouse model, data from related phase I trial with low frequency adverse events | 23.52                    | <0.001       | 14.59                    | <0.001       | 6.34                     | <0.001       | 3.98                     | <0.001       | 1.58                     | 0.034        | 1.00                     | 1.000        |

<sup>a</sup>For each of the types of preclinical evidence, odds ratios are expressed as the likelihood that support for a hypothetical trial was associated with a change in clinical scenario, relative to the scenario where there was no available treatment and death occurred in infancy.

**Table S2. Analysis of the effects of varying preclinical evidence for GEE models fitted individually for each clinical scenario<sup>a</sup>**

|                   | Large animal model       |              | Good mouse model with data from related phase I without adverse events |              | Good mouse model         |              | Good mouse model with data from related phase I with low frequency adverse events |              | Good mouse model, large animal study would delay trial by 3 years |              | Poor mouse model         |              | Primary human cells      |              |
|-------------------|--------------------------|--------------|------------------------------------------------------------------------|--------------|--------------------------|--------------|-----------------------------------------------------------------------------------|--------------|-------------------------------------------------------------------|--------------|--------------------------|--------------|--------------------------|--------------|
| Clinical Scenario | Odds ratio (95% Wald CI) | Wald p-value | Odds ratio (95% Wald CI)                                               | Wald p-value | Odds ratio (95% Wald CI) | Wald p-value | Odds ratio (95% Wald CI)                                                          | Wald p-value | Odds ratio (95% Wald CI)                                          | Wald p-value | Odds ratio (95% Wald CI) | Wald p-value | Odds ratio (95% Wald CI) | Wald p-value |
| Scenario 1        | 29.37                    | <0.001       | 19.32                                                                  | <0.001       | 7.27                     | <0.001       | 7.84                                                                              | <0.001       | 4.97                                                              | <0.001       | 3.38                     | <0.001       | 1.24                     | 0.004        |
| Scenario 2        | 136.32                   | <0.001       | 26.55                                                                  | <0.001       | 8.27                     | <0.001       | 8.92                                                                              | <0.001       | 5.98                                                              | <0.001       | 3.85                     | <0.001       | 1.17                     | 0.013        |
| Scenario 3        | 102.31                   | <0.001       | 40.13                                                                  | <0.001       | 10.19                    | <0.001       | 8.54                                                                              | <0.001       | 4.43                                                              | <0.001       | 3.28                     | <0.001       | 1.14                     | 0.129        |
| Scenario 4        | 36.02                    | <0.001       | 36.02                                                                  | <0.001       | 6.92                     | <0.001       | 6.28                                                                              | <0.001       | 3.64                                                              | <0.001       | 3.19                     | <0.001       | 1.23                     | 0.106        |
| Scenario 5        | 37.90                    | <0.001       | 18.43                                                                  | <0.001       | 7.40                     | <0.001       | 6.45                                                                              | <0.001       | 4.03                                                              | <0.001       | 3.20                     | <0.001       | 1.49                     | 0.002        |
| Scenario 6        | 26.21                    | <0.001       | 17.46                                                                  | <0.001       | 6.27                     | <0.001       | 3.64                                                                              | <0.001       | 3.19                                                              | <0.001       | 2.62                     | <0.001       | 1.30                     | 0.056        |
| Scenario 7        | 26.66                    | <0.001       | 18.63                                                                  | <0.001       | 6.51                     | <0.001       | 4.38                                                                              | <0.001       | 4.38                                                              | <0.001       | 3.16                     | <0.001       | 1.24                     | 0.081        |

<sup>a</sup>For each of the clinical scenarios, odds ratios are expressed as the likelihood that support for a hypothetical trial was associated with a change in type of preclinical evidence, relative to the evidence generated in a cell culture model where a mouse model could be generated within two years.
